# Supplementary material
Source: MDPI journal article supplement (https://www.mdpi.com/2624-8549/5/2/94)
Supplement: s1 [file s1]

## SUPPORTING INFORMATION

### Reactivity of Rare-Earth Oxides in Anhydrous Imidazolium Acetate Ionic Liquid

Sameera Shah, Tobias Pietsch, Maria Annette Herz, Franziska Jach, Michael Ruck

#### Contents

|                                                                                                                                                                                                                                                                                                                                                                                                  |    |
|--------------------------------------------------------------------------------------------------------------------------------------------------------------------------------------------------------------------------------------------------------------------------------------------------------------------------------------------------------------------------------------------------|----|
| <b>Table S1.</b> Results of reactions of 1 mmol $\text{La}_2\text{O}_3$ with 10 mmol of various imidazolium or phosphonium based ILs. In all cases, a reaction temperature of 175 °C was applied for 48 h.....                                                                                                                                                                                   | 3  |
| <b>Table S2.</b> Reaction parameters of various $\text{RE}_2\text{O}_3$ used in this work. In all cases, the reaction temperature was 175 °C. ....                                                                                                                                                                                                                                               | 3  |
| <b>Figure S1.</b> PXRD pattern of the white microcrystalline precipitate that formed by the reaction of $\text{La}_2\text{O}_3$ with [BDMIm][OAc] and acetic acid at room temperature together with the patterns of some reference compounds. ....                                                                                                                                               | 4  |
| <b>Figure S2.</b> Crystals of $[\text{BMIm}]_2[\text{La}_2(\text{OAc})_8]$ formed in the absence (left) or presence of chloride (right). ....                                                                                                                                                                                                                                                    | 4  |
| <b>Figure S3.</b> PXRD diffractograms of the solid residuals after selective solution of one component from the mixtures $\text{La}_2\text{O}_3/\text{Sc}_2\text{O}_3$ , $\text{La}_2\text{O}_3/\text{Lu}_2\text{O}_3$ , $\text{Eu}_2\text{O}_3/\text{Y}_2\text{O}_3$ , and $\text{Eu}_2\text{O}_3/\text{CeO}_2$ . ....                                                                          | 5  |
| <b>Figure S4.</b> Pure [BMIm][OAc] (a), regenerated IL (b), $\text{La}_2\text{O}_3$ dissolved in the IL (c), and decomposed IL (d). ....                                                                                                                                                                                                                                                         | 5  |
| <b>Figure S5.</b> FTIR spectra of neat and regenerated [BMIm][OAc].....                                                                                                                                                                                                                                                                                                                          | 6  |
| <b>Figure S6.</b> $^1\text{H}$ NMR spectra of regenerated [BMIm][OAc] with different water content...6                                                                                                                                                                                                                                                                                           | 6  |
| <b>Figure S7.</b> Simulated (based on crystal structure) and measured powder X-ray diffractogram of $[\text{BMIm}]_2[\text{Eu}_2(\text{OAc})_8]$ . ....                                                                                                                                                                                                                                          | 7  |
| <b>Figure S8.</b> On cooling, the crystals of $[\text{BMIm}]_2[\text{Dy}_2(\text{OAc})_8]$ changed to needle like morphology, after one day to snow-like flakes, then on further cooling dendrites formed that decomposed after few days. Due to very weak intensity, we could not measure single-crystal diffraction data, however, the PXRD and FT-IR analysis showed a structural change..... | 7  |
| <b>Figure S9.</b> PXRD diffractogram measured at 100 K of $[\text{BMIm}]_2[\text{Dy}_2(\text{OAc})_8]$ crystals grown at room temperature or at 5 °C. ....                                                                                                                                                                                                                                       | 8  |
| <b>Figure S10.</b> FTIR spectra of the IL and $[\text{BMIm}]_2[\text{Dy}_2(\text{OAc})_8]$ crystals grown at room temperature or at 5 °C.....                                                                                                                                                                                                                                                    | 8  |
| <b>Table S3.</b> Crystallographic data for $[\text{BMIm}]_2[\text{RE}_2(\text{OAc})_8]$ salts at 100(2) K. ....                                                                                                                                                                                                                                                                                  | 9  |
| <b>Table S4.</b> Metal-metal and metal-oxygen bond distances of all complexes studied in this work. ....                                                                                                                                                                                                                                                                                         | 10 |
| <b>Table S5.</b> Selected interatomic distances ( $\text{\AA}$ ) in the Eu and La compounds, which belong to different structure types. ....                                                                                                                                                                                                                                                     | 11 |

|                                                                                                                                                                                                                                                                                                                                                                                                                                                                                                                                                                                                                                                                                                                                                    |    |
|----------------------------------------------------------------------------------------------------------------------------------------------------------------------------------------------------------------------------------------------------------------------------------------------------------------------------------------------------------------------------------------------------------------------------------------------------------------------------------------------------------------------------------------------------------------------------------------------------------------------------------------------------------------------------------------------------------------------------------------------------|----|
| <b>Figure S11.</b> Analogous sections of the structures of [BMIm] <sub>2</sub> [Pr <sub>2</sub> (OAc) <sub>8</sub> ] (left) and [BMIm] <sub>2</sub> [Ho <sub>2</sub> (OAc) <sub>8</sub> ] (right), reduced to their <i>RE</i> cations. The analogous subcells of the two structure types emphasize the different positions of the <i>RE</i> <sup>3+</sup> cations relative to the centers of inversion (indicated as red dots). Translational pseudosymmetry is observed (pseudo-B-centering left, pseudo-A-centering right). Angles in the specified subcells for the Pr/Ho compound (dark axes, sorted according to increasing length): $\alpha = 91.2^\circ/91.2^\circ$ , $\beta = 98.1^\circ/101.6^\circ$ , $\gamma = 99.4^\circ/99.5^\circ$ . | 11 |
| <b>Figure S12.</b> FTIR spectra of neat [BMIm][OAc], a fresh solution of La <sub>2</sub> O <sub>3</sub> in the IL, and a solution with decomposed IL.                                                                                                                                                                                                                                                                                                                                                                                                                                                                                                                                                                                              | 12 |
| <b>Figure S13.</b> <sup>13</sup> C (top) and <sup>1</sup> H NMR (bottom) spectra of neat [BMIm][OAc], of a freshly prepared solution of La <sub>2</sub> O <sub>3</sub> in the IL, and of a solution with largely decomposed IL.                                                                                                                                                                                                                                                                                                                                                                                                                                                                                                                    | 13 |
| <b>Figure S14.</b> <sup>13</sup> C NMR spectrum and DEPT 135 <sup>13</sup> C NMR spectrum of a freshly prepared La <sub>2</sub> O <sub>3</sub> solution in [BMIm][OAc].                                                                                                                                                                                                                                                                                                                                                                                                                                                                                                                                                                            | 14 |
| <b>Figure S15.</b> Degradation of [BMIm] <sub>2</sub> [Dy <sub>2</sub> (OAc) <sub>8</sub> ] crystals in the reaction mixture after one month in air.                                                                                                                                                                                                                                                                                                                                                                                                                                                                                                                                                                                               | 15 |
| <b>Figure S16.</b> PXRD diffractogram of [BMIm] <sub>2</sub> [Eu <sub>2</sub> (OAc) <sub>8</sub> ] samples after DSC or after TG under argon with a maximum temperature of 500 °C.                                                                                                                                                                                                                                                                                                                                                                                                                                                                                                                                                                 | 15 |
| <b>Figure S17.</b> Luminescence of [BMIm] <sub>2</sub> [Tb <sub>2</sub> (OAc) <sub>8</sub> ] under UV light of 312 nm.                                                                                                                                                                                                                                                                                                                                                                                                                                                                                                                                                                                                                             | 16 |
| <b>Figure S18.</b> $\chi_m T$ and $\chi_m^{-1}$ plots for [BMIm] <sub>2</sub> [Sm <sub>2</sub> (OAc) <sub>8</sub> ] and [BMIm] <sub>2</sub> [Eu <sub>2</sub> (OAc) <sub>8</sub> ].                                                                                                                                                                                                                                                                                                                                                                                                                                                                                                                                                                 | 17 |
| <b>Figure S19.</b> Magnetization ( <i>M</i> ) versus field ( <i>H</i> ) for [BMIm] <sub>2</sub> [Sm <sub>2</sub> (OAc) <sub>8</sub> ] and [BMIm] <sub>2</sub> [Eu <sub>2</sub> (OAc) <sub>8</sub> ].                                                                                                                                                                                                                                                                                                                                                                                                                                                                                                                                               | 18 |

**Table S1.** Results of reactions of 1 mmol  $\text{La}_2\text{O}_3$  with 10 mmol of various imidazolium or phosphonium based ILs. In all cases, a reaction temperature of 175 °C was applied for 48 h.

| ILs                                      | Observation                             | Solid product           |
|------------------------------------------|-----------------------------------------|-------------------------|
| [P <sub>66614</sub> ][DCA]               | Dark brown liquid with unreacted solids | $\text{La}_2\text{O}_3$ |
| [P <sub>66614</sub> ][Cl]                | White suspension                        | $\text{La}_2\text{O}_3$ |
| [P <sub>66614</sub> ][Nf <sub>2</sub> T] | White suspension                        | $\text{La}_2\text{O}_3$ |
| [P <sub>66614</sub> ][OAc]               | White suspension                        | $\text{La}_2\text{O}_3$ |
| [BMIm][OAc]                              | Light brown liquid                      | —                       |
| [BMIm][Cl]                               | White suspension                        | $\text{La}_2\text{O}_3$ |
| [BMIm][Nf <sub>2</sub> T]                | White suspension                        | $\text{La}_2\text{O}_3$ |

**Table S2.** Reaction parameters of various  $\text{RE}_2\text{O}_3$  used in this work. In all cases, the reaction temperature was 175 °C.

| $\text{RE}_2\text{O}_3$                         | [BMIm][OAc] : [BMIm][Cl] | Duration [h] | Yield [%]     | Observation                          | Solid product or residual                                                             |
|-------------------------------------------------|--------------------------|--------------|---------------|--------------------------------------|---------------------------------------------------------------------------------------|
| $\text{La}_2\text{O}_3$                         | 10 : 0 or 10 : 1         | 16           | 85            | transparent yellow liquid            | [BMIm] <sub>2</sub> [La <sub>2</sub> (OAc) <sub>8</sub> ]                             |
| $\text{Ce}_2\text{O}_3$                         | 10 : 0 or 10 : 1         | 16           | 79            | transparent yellow liquid            | [BMIm] <sub>2</sub> [Ce <sub>2</sub> (OAc) <sub>8</sub> ]                             |
| $\text{Pr}_2\text{O}_3$                         | 10 : 0 or 10 : 1         | 16           | 84            | transparent yellow liquid            | [BMIm] <sub>2</sub> [Pr <sub>2</sub> (OAc) <sub>8</sub> ]                             |
| $\text{Nd}_2\text{O}_3$                         | 10 : 0 or 10 : 1         | 16           | 84            | transparent yellow liquid            | [BMIm] <sub>2</sub> [Nd <sub>2</sub> (OAc) <sub>8</sub> ]                             |
| $\text{Sm}_2\text{O}_3$                         | 10 : 0 or 10 : 1         | 16           | 84            | transparent yellow liquid            | [BMIm] <sub>2</sub> [Sm <sub>2</sub> (OAc) <sub>8</sub> ]                             |
| $\text{Eu}_2\text{O}_3$                         | 10 : 0 or 10 : 1         | 16           | 83            | transparent yellow liquid            | [BMIm] <sub>2</sub> [Eu <sub>2</sub> (OAc) <sub>8</sub> ]                             |
| $\text{Gd}_2\text{O}_3$                         | 10 : 5                   | 48           | 70            | transparent yellow liquid            | [BMIm] <sub>2</sub> [Gd <sub>2</sub> (OAc) <sub>8</sub> ]                             |
| $\text{Tb}_2\text{O}_3$                         | 10 : 5                   | 48           | 70            | transparent yellow liquid            | [BMIm] <sub>2</sub> [Tb <sub>2</sub> (OAc) <sub>8</sub> ]                             |
| $\text{Dy}_2\text{O}_3$                         | 10 : 5                   | 48           | 70            | transparent yellow liquid            | [BMIm] <sub>2</sub> [Dy <sub>2</sub> (OAc) <sub>8</sub> ]                             |
| $\text{Ho}_2\text{O}_3$                         | 10 : 5                   | 48           | 25            | unreacted solid in dark brown liquid | [BMIm] <sub>2</sub> [Ho <sub>2</sub> (OAc) <sub>8</sub> ] and $\text{Ho}_2\text{O}_3$ |
| $\text{Er}_2\text{O}_3$                         | 10 : 5                   | 48           | 96 % of solid | unreacted solid in dark brown liquid | $\text{Er}_2\text{O}_3$                                                               |
| $\text{Lu}_2\text{O}_3$                         | 10 : 5                   | 48           | 99 % of solid | unreacted solid in dark brown liquid | $\text{Lu}_2\text{O}_3$                                                               |
| $\text{Sc}_2\text{O}_3$                         | 10 : 5                   | 48           | 99 % of solid | unreacted solid in dark brown liquid | $\text{Sc}_2\text{O}_3$                                                               |
| $\text{Y}_2\text{O}_3$                          | 10 : 5                   | 48           | 99 % of solid | unreacted solid in dark brown liquid | $\text{Y}_2\text{O}_3$                                                                |
| $\text{La}_2\text{O}_3 + \text{Sc}_2\text{O}_3$ | 10 : 5                   | 16           | 99 % of solid | unreacted solid in dark brown liquid | $\text{Sc}_2\text{O}_3$                                                               |
| $\text{La}_2\text{O}_3 + \text{Lu}_2\text{O}_3$ | 10 : 5                   | 16           | 99 % of solid | unreacted solid in dark brown liquid | $\text{Lu}_2\text{O}_3$                                                               |
| $\text{Eu}_2\text{O}_3 + \text{Y}_2\text{O}_3$  | 10 : 5                   | 16           | 99 % of solid | unreacted solid in dark brown liquid | $\text{Y}_2\text{O}_3$                                                                |
| $\text{Eu}_2\text{O}_3 + \text{CeO}_2$          | 10 : 5                   | 16           | 99 % of solid | unreacted solid in dark brown liquid | $\text{CeO}_2$                                                                        |

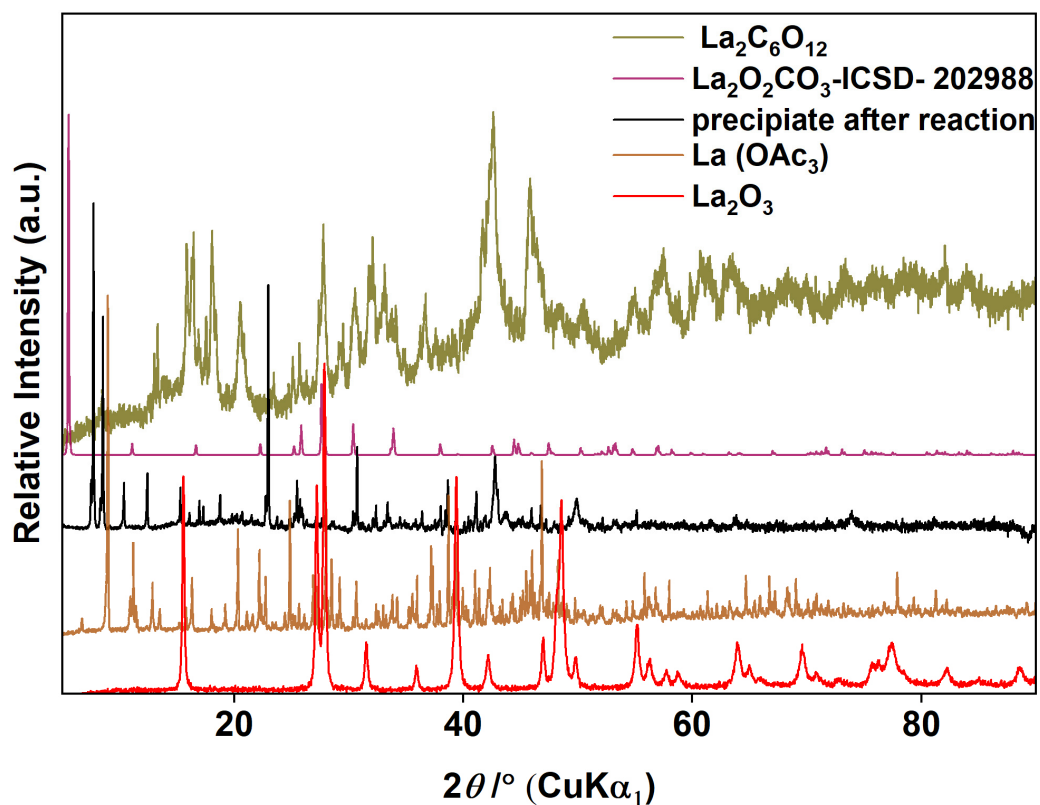

**Figure S1.** PXRD pattern of the white microcrystalline precipitate that formed by the reaction of  $\text{La}_2\text{O}_3$  with  $[\text{BDMIm}][\text{OAc}]$  and acetic acid at room temperature together with the patterns of some reference compounds.

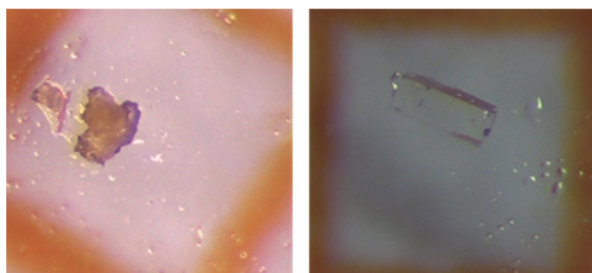

**Figure S2.** Crystals of  $[\text{BMIm}]_2[\text{La}_2(\text{OAc})_8]$  formed in the absence (left) or presence of chloride (right).

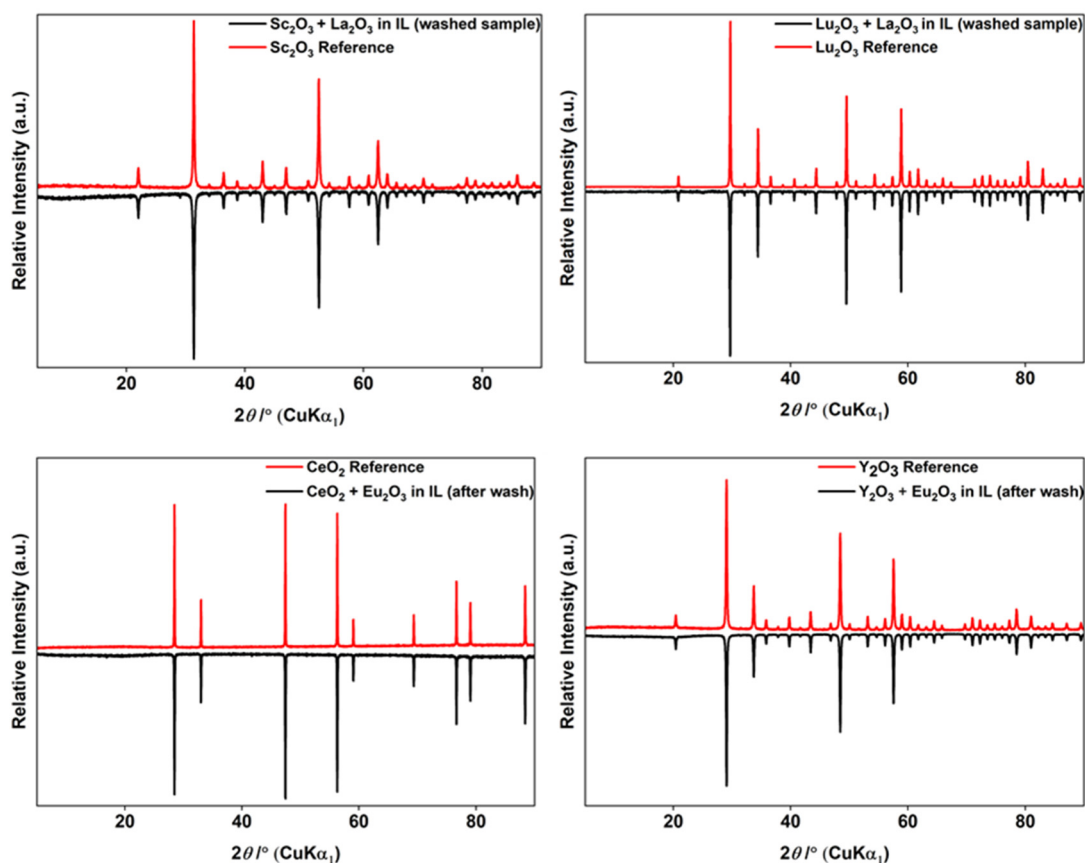

**Figure S3.** PXRD diffractograms of the solid residuals after selective solution of one component from the mixtures  $\text{La}_2\text{O}_3/\text{Sc}_2\text{O}_3$ ,  $\text{La}_2\text{O}_3/\text{Lu}_2\text{O}_3$ ,  $\text{Eu}_2\text{O}_3/\text{Y}_2\text{O}_3$ , and  $\text{Eu}_2\text{O}_3/\text{CeO}_2$ .

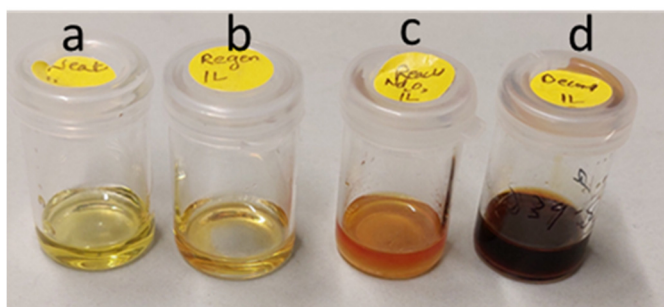

**Figure S4.** Pure  $[\text{BMIm}][\text{OAc}]$  (a), regenerated IL (b),  $\text{La}_2\text{O}_3$  dissolved in the IL (c), and decomposed IL (d).

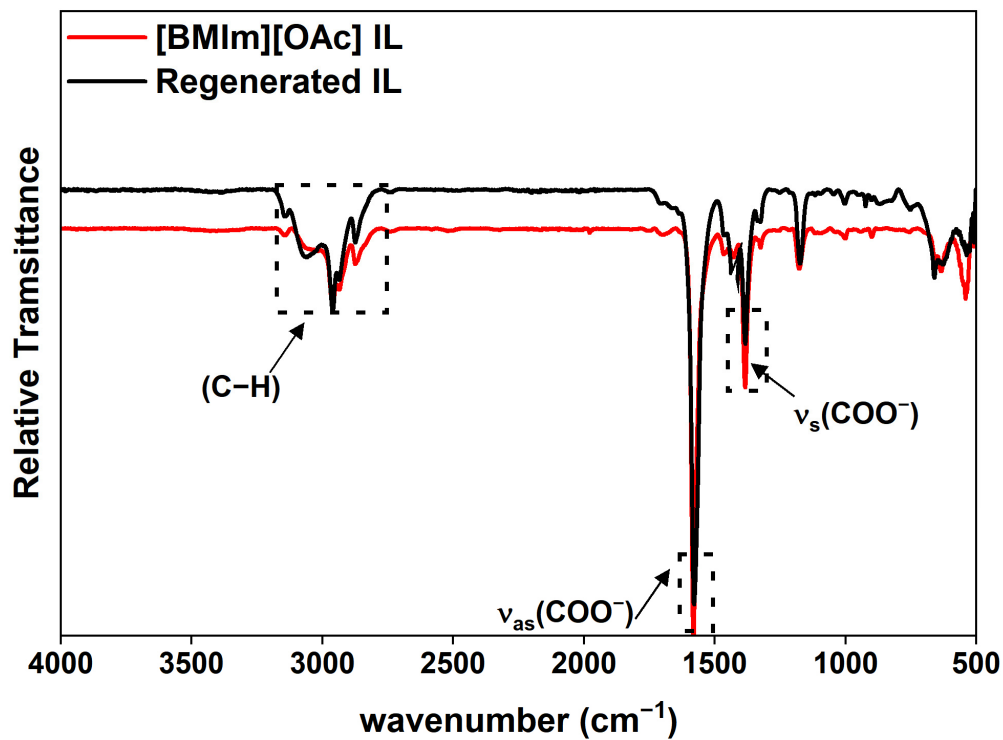

Figure S5. FTIR spectra of neat and regenerated [BMIm][OAc].

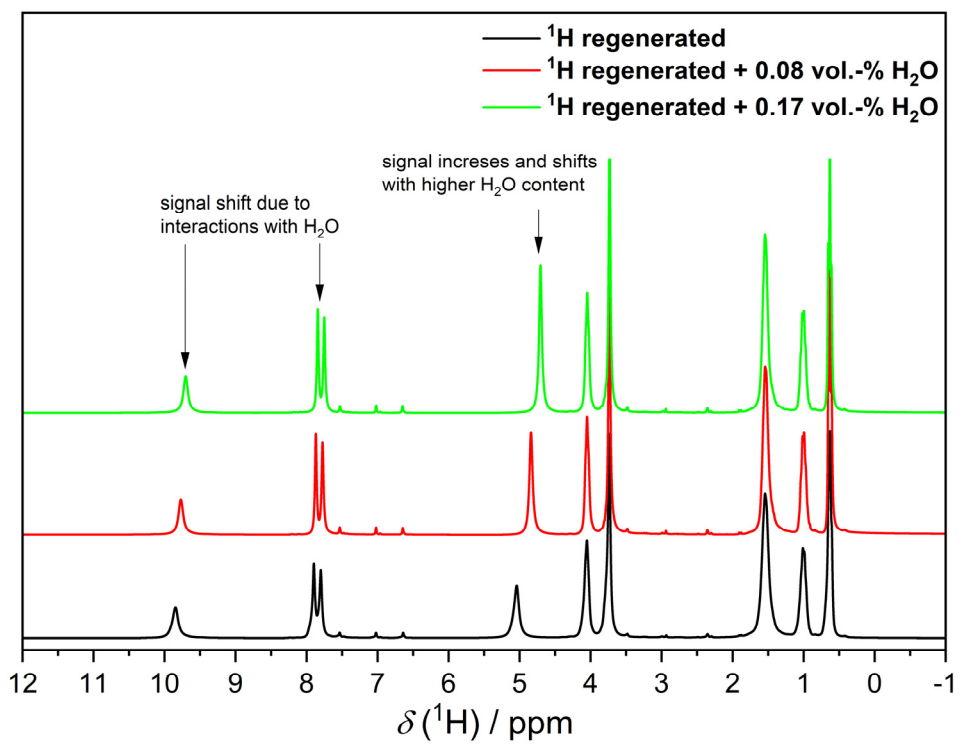

Figure S6.  $^1\text{H}$  NMR spectra of regenerated [BMIm][OAc] with different water content.

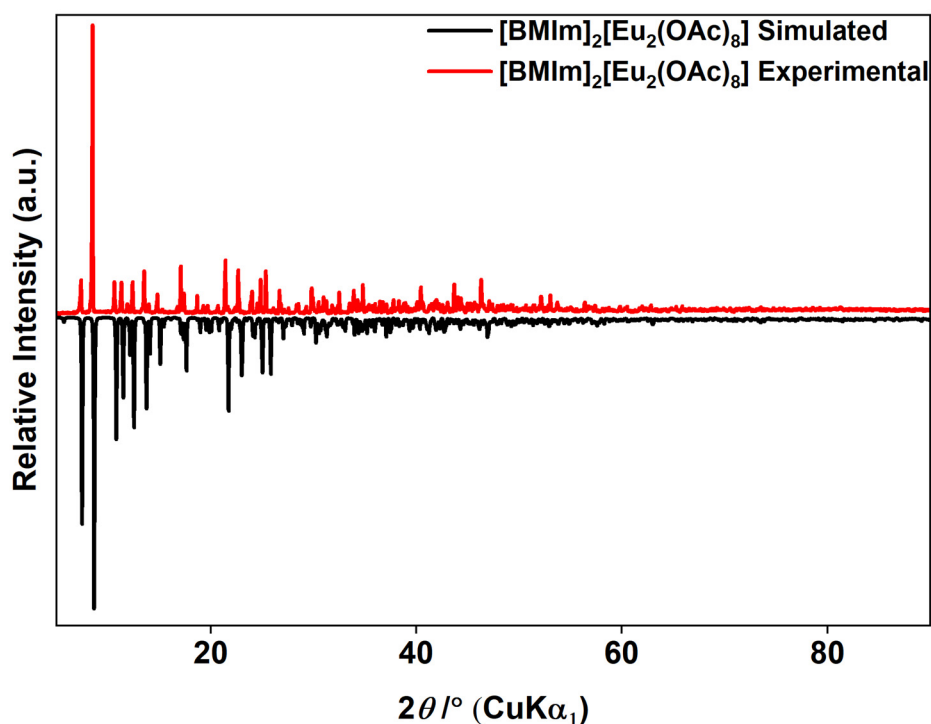

**Figure S7.** Simulated (based on crystal structure) and measured powder X-ray diffractogram of  $[\text{BMIm}]_2[\text{Eu}_2(\text{OAc})_8]$ .

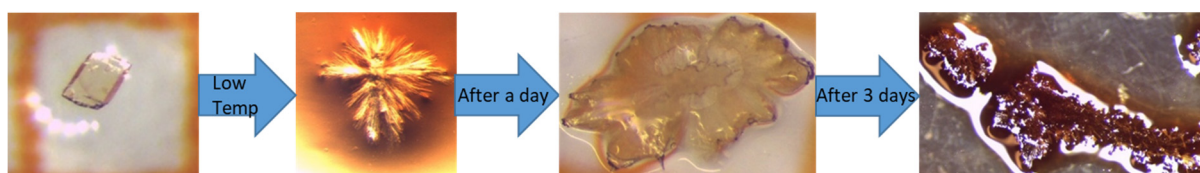

**Figure S8.** On cooling, the crystals of  $[\text{BMIm}]_2[\text{Dy}_2(\text{OAc})_8]$  changed to needle like morphology, after one day to snow-like flakes, then on further cooling dendrites formed that decomposed after few days. Due to very weak intensity, we could not measure single-crystal diffraction data, however, the PXRD and FT-IR analysis showed a structural change.

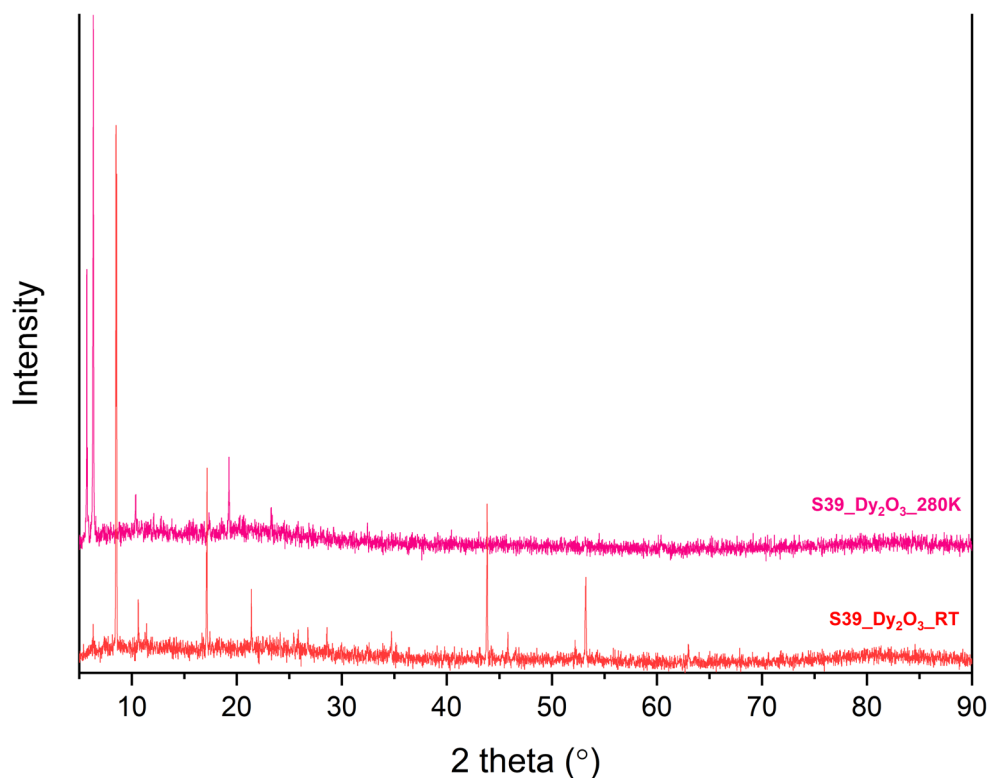

**Figure S9.** PXRD diffractogram measured at 100 K of  $[\text{BMIm}]_2[\text{Dy}_2(\text{OAc})_8]$  crystals grown at room temperature or at 5 °C.

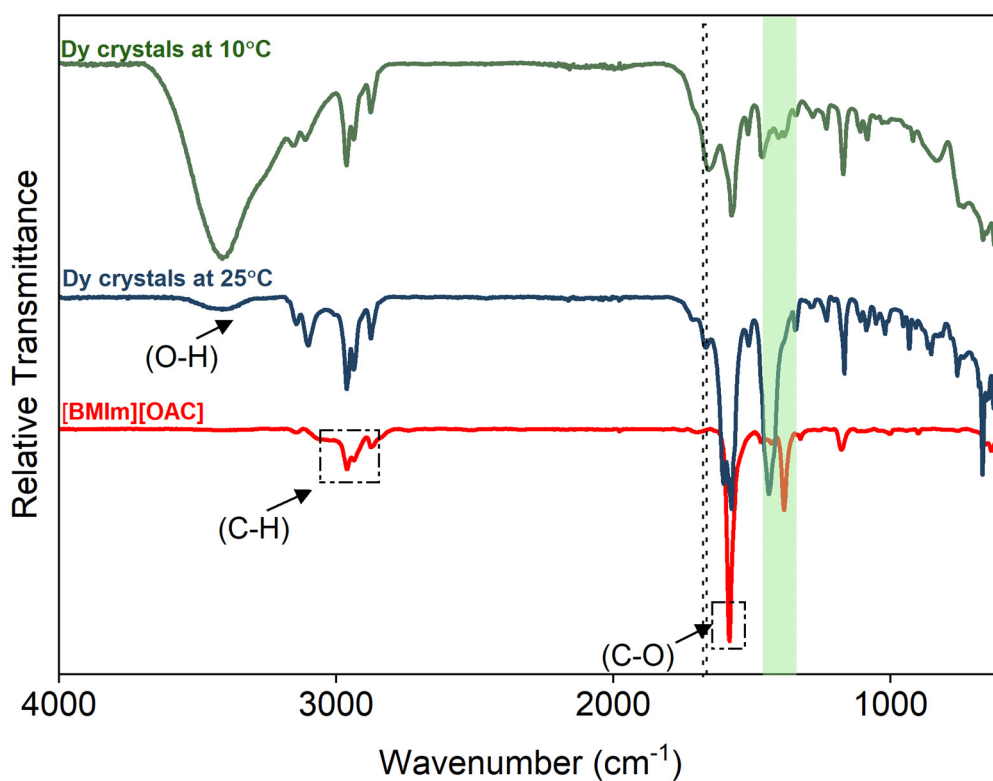

**Figure S10.** FTIR spectra of the IL and  $[\text{BMIm}]_2[\text{Dy}_2(\text{OAc})_8]$  crystals grown at room temperature or at 5 °C.



**Table S3.** Crystallographic data for [BMIm]<sub>2</sub>[RE<sub>2</sub>(OAc)<sub>8</sub>] salts at 100(2) K.

| RE                                                                              | La                                                                   | Pr                                                                   | Nd                                                                   | Sm                                                                   |
|---------------------------------------------------------------------------------|----------------------------------------------------------------------|----------------------------------------------------------------------|----------------------------------------------------------------------|----------------------------------------------------------------------|
| Crystal system                                                                  | triclinic                                                            | triclinic                                                            | triclinic                                                            | triclinic                                                            |
| Space group                                                                     | $P\bar{1}$ (no. 2)                                                   | $P\bar{1}$ (no. 2)                                                   | $P\bar{1}$ (no. 2)                                                   | $P\bar{1}$ (no. 2)                                                   |
| $a / \text{\AA}$                                                                | 12.1364(3)                                                           | 12.0863(4)                                                           | 8.410(1)                                                             | 8.4141(3)                                                            |
| $b / \text{\AA}$                                                                | 13.7492(4)                                                           | 13.6472(4)                                                           | 15.714(2)                                                            | 15.6356(5)                                                           |
| $c / \text{\AA}$                                                                | 14.4262(4)                                                           | 14.4723(4)                                                           | 16.071(2)                                                            | 16.0023(5)                                                           |
| $\alpha / ^\circ$                                                               | 110.294(1)                                                           | 110.460(2)                                                           | 98.253(4)                                                            | 98.088(2)                                                            |
| $\beta / ^\circ$                                                                | 102.682(1)                                                           | 102.248(2)                                                           | 103.809(4)                                                           | 103.858(2)                                                           |
| $\gamma / ^\circ$                                                               | 104.303(1)                                                           | 104.517(2)                                                           | 90.271(4)                                                            | 90.347(2)                                                            |
| $V / \text{\AA}^3$                                                              | 2060.8(1)                                                            | 2043.5(1)                                                            | 2039.4(4)                                                            | 2021.9(1)                                                            |
| $Z$                                                                             | 2                                                                    | 2                                                                    | 2                                                                    | 2                                                                    |
| $\rho_{\text{calc.}} / (\text{g cm}^{-3})$                                      | 1.658                                                                | 1.678                                                                | 1.692                                                                | 1.727                                                                |
| $\mu(\text{Mo-K}\alpha) / \text{mm}^{-1}$                                       | 2.12                                                                 | 2.43                                                                 | 2.59                                                                 | 2.95                                                                 |
| Crystal size / $\mu\text{m}^3$                                                  | 31 × 60 × 70                                                         | 39 × 65 × 65                                                         | 25 × 50 × 58                                                         | 74 × 89 × 104                                                        |
| $2\theta_{\text{max}} / ^\circ$                                                 | 72.8                                                                 | 78.3                                                                 | 64.5                                                                 | 78.6                                                                 |
| Index range                                                                     | $-20 \leq h \leq 19$<br>$-22 \leq k \leq 22$<br>$-24 \leq l \leq 23$ | $-21 \leq h \leq 19$<br>$-22 \leq k \leq 24$<br>$-25 \leq l \leq 23$ | $-12 \leq h \leq 12$<br>$-23 \leq k \leq 23$<br>$-23 \leq l \leq 23$ | $-14 \leq h \leq 14$<br>$-27 \leq k \leq 27$<br>$-28 \leq l \leq 28$ |
| Reflections<br>measured, unique,<br>$F_o > 4 F_\sigma$                          | 168374, 19752,<br>15880                                              | 191624, 23834,<br>17119                                              | 86255, 13673,<br>10410                                               | 256225, 23661,<br>19897                                              |
| $R_{\text{int}}, R_\sigma$                                                      | 0.039, 0.029                                                         | 0.043, 0.037                                                         | 0.054, 0.043                                                         | 0.053, 0.031                                                         |
| Parameters,<br>restraints                                                       | 564, 132                                                             | 564, 132                                                             | 499, 0                                                               | 499, 0                                                               |
| $R_1[F_o > 4\sigma(F_o)],$<br>$wR_2(\text{all}), \text{Goof}$                   | 0.027, 0.057, 1.32                                                   | 0.037, 0.046, 1.86                                                   | 0.029, 0.043, 1.26                                                   | 0.025, 0.037, 1.44                                                   |
| Residual electron<br>density / ( $\text{e} \cdot 10^{-6}$<br>$\text{pm}^{-3}$ ) | −1.32 to 2.87<br>close to La                                         | −2.71 to 2.52<br>close to Pr                                         | −1.06 to 1.08<br>close to Nd                                         | −1.32 to 1.19<br>close to Sm                                         |

**Table S3 (continued)**

| RE                                                                     | Eu                                                                   | Tb                                                                   | Ho                                                                   |
|------------------------------------------------------------------------|----------------------------------------------------------------------|----------------------------------------------------------------------|----------------------------------------------------------------------|
| Crystal system                                                         | triclinic                                                            | triclinic                                                            | triclinic                                                            |
| Space group                                                            | $P\bar{1}$ (no. 2)                                                   | $P\bar{1}$ (no. 2)                                                   | $P\bar{1}$ (no. 2)                                                   |
| $a / \text{\AA}$                                                       | 8.4242(3)                                                            | 8.4144(4)                                                            | 8.4180(3)                                                            |
| $b / \text{\AA}$                                                       | 15.6486(6)                                                           | 15.5531(8)                                                           | 15.5315(5)                                                           |
| $c / \text{\AA}$                                                       | 16.0129(7)                                                           | 15.9555(8)                                                           | 15.9429(6)                                                           |
| $\alpha / ^\circ$                                                      | 98.039(1)                                                            | 97.829(3)                                                            | 97.785(2)                                                            |
| $\beta / ^\circ$                                                       | 103.845(1)                                                           | 103.998(3)                                                           | 103.976(2)                                                           |
| $\gamma / ^\circ$                                                      | 90.314(1)                                                            | 90.379(3)                                                            | 90.383(2)                                                            |
| $V / \text{\AA}^3$                                                     | 2027.8(1)                                                            | 2005.5(2)                                                            | 2002.4(1)                                                            |
| $Z$                                                                    | 2                                                                    | 2                                                                    | 2                                                                    |
| $\rho_{\text{calc.}} / (\text{g cm}^{-3})$                             | 1.727                                                                | 1.770                                                                | 1.792                                                                |
| $\mu(\text{Mo-K}\alpha) / \text{mm}^{-1}$                              | 3.14                                                                 | 3.57                                                                 | 4.00                                                                 |
| Crystal size / $\mu\text{m}^3$                                         | $36 \times 42 \times 51$                                             | $37 \times 43 \times 56$                                             | $19 \times 25 \times 38$                                             |
| $2\theta_{\text{max}} / ^\circ$                                        | 69.0                                                                 | 73.1                                                                 | 69.8                                                                 |
| Index range                                                            | $-13 \leq h \leq 13$<br>$-24 \leq k \leq 24$<br>$-25 \leq l \leq 25$ | $-14 \leq h \leq 14$<br>$-25 \leq k \leq 25$<br>$-26 \leq l \leq 26$ | $-13 \leq h \leq 13$<br>$-24 \leq k \leq 24$<br>$-25 \leq l \leq 25$ |
| Reflections measured, unique, $F_o > 4 F_\sigma$                       | 117435, 17220, 13545                                                 | 178745, 19404, 13740                                                 | 154211, 16615, 12526                                                 |
| $R_{\text{int}}, R_\sigma$                                             | 0.050, 0.035                                                         | 0.104, 0.070                                                         | 0.057, 0.041                                                         |
| Parameters, restraints                                                 | 499, 0                                                               | 499, 0                                                               | 499, 0                                                               |
| $R_1[F_o > 4\sigma(F_o)], wR_2(\text{all}), \text{Goof}$               | 0.026, 0.034, 1.31                                                   | 0.041, 0.070, 1.19                                                   | 0.029, 0.034, 1.37                                                   |
| Residual electron density / $(\text{e} \cdot 10^{-6} \text{ pm}^{-3})$ | -0.99 to 1.23<br>close to Eu                                         | -3.28 to 1.83<br>close to Tb                                         | -1.20 to 1.78<br>close to Ho                                         |

**Table S4.** Metal-metal and metal-oxygen bond distances of all complexes studied in this work.

| Complex salt                                              | RE-RE distance (Å) | RE-O distance (Å) |
|-----------------------------------------------------------|--------------------|-------------------|
| [BMIm] <sub>2</sub> [La <sub>2</sub> (OAc) <sub>8</sub> ] | 4.061(1)           | 2.454(0)–2.639(1) |
| [BMIm] <sub>2</sub> [Pr <sub>2</sub> (OAc) <sub>8</sub> ] | 4.000(1)           | 2.432(1)–2.629(1) |
| [BMIm] <sub>2</sub> [Nd <sub>2</sub> (OAc) <sub>8</sub> ] | 3.990(2)           | 2.420(2)–2.592(2) |
| [BMIm] <sub>2</sub> [Sm <sub>2</sub> (OAc) <sub>8</sub> ] | 3.911(1)           | 2.366(1)–2.564(1) |
| [BMIm] <sub>2</sub> [Eu <sub>2</sub> (OAc) <sub>8</sub> ] | 3.905(1)           | 2.357(1)–2.532(1) |
| [BMIm] <sub>2</sub> [Tb <sub>2</sub> (OAc) <sub>8</sub> ] | 3.865(2)           | 2.323(1)–2.537(1) |
| [BMIm] <sub>2</sub> [Ho <sub>2</sub> (OAc) <sub>8</sub> ] | 3.845(1)           | 2.302(1)–2.517(1) |

**Table S5.** Selected interatomic distances ( $\text{\AA}$ ) in the Eu and La compounds, which belong to different structure types.

| Atom pair | $d$ [ $\text{\AA}$ ] | Atom pair | $d$ [ $\text{\AA}$ ] | $d$ [ $\text{\AA}$ ] | $d$ [ $\text{\AA}$ ] |
|-----------|----------------------|-----------|----------------------|----------------------|----------------------|
| Eu2...Eu2 | 3.938(1)             | La1...La2 | 4.061(1)             | La2-O11              | 2.630(1)             |
| Eu1...Eu1 | 3.905(1)             | La1-O1    | 2.573(1)             | La1-O12              | 2.479(0)             |
|           |                      | La1-O2    | 2.566(1)             | La1-O13              | 2.461(1)             |
| Eu1-O1    | 2.498(1)             | La1-O3    | 2.558(1)             | La2-O14              | 2.474(1)             |
| Eu1-O2    | 2.482(1)             | La1-O4    | 2.573(1)             | La2-O15              | 2.486(1)             |
| Eu1-O3    | 2.498(1)             | La2-O5    | 2.592(1)             | La1-O16              | 2.485(1)             |
| Eu1-O4    | 2.462(1)             | La2-O6    | 2.566(1)             |                      |                      |
| Eu1-O5    | 2.392(1)             | La2-O7    | 2.581(1)             |                      |                      |
| Eu1-O6    | 2.383(1)             | La2-O8    | 2.555(1)             |                      |                      |
| Eu1-O7    | 2.357(1)             | La1-O9    | 2.639(1)             |                      |                      |
| Eu1-O8    | 2.532(1)             | La2-O10   | 2.454(1)             |                      |                      |

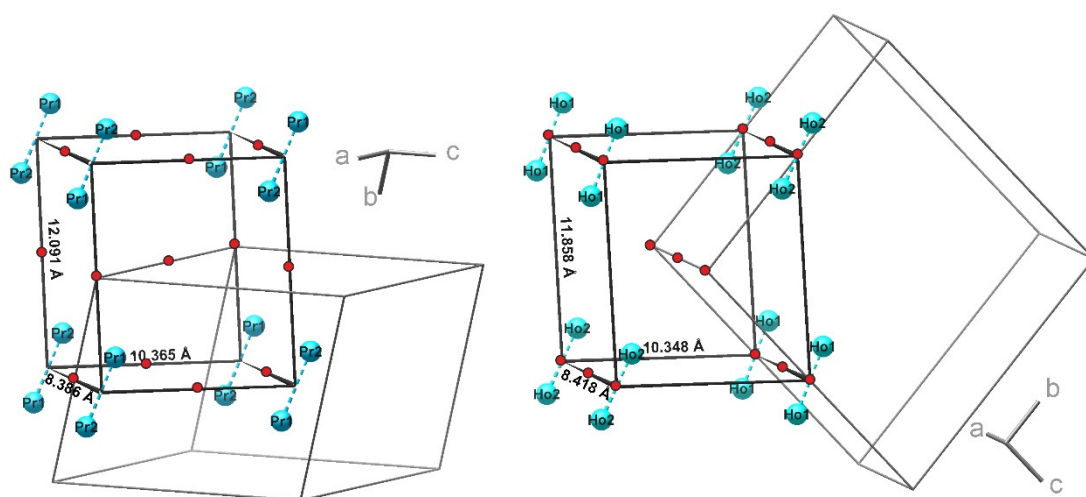

**Figure S11.** Analogous sections of the structures of  $[\text{BMIm}]_2[\text{Pr}_2(\text{OAc})_8]$  (left) and  $[\text{BMIm}]_2[\text{Ho}_2(\text{OAc})_8]$  (right), reduced to their  $RE$  cations. The analogous subcells of the two structure types emphasize the different positions of the  $RE^{3+}$  cations relative to the centers of inversion (indicated as red dots). Translational pseudosymmetry is observed (pseudo-B-centering left, pseudo-A-centering right). Angles in the specified subcells for the Pr/Ho compound (dark axes, sorted according to increasing length):  $\alpha = 91.2^\circ/91.2^\circ$ ,  $\beta = 98.1^\circ/101.6^\circ$ ,  $\gamma = 99.4^\circ/99.5^\circ$ .

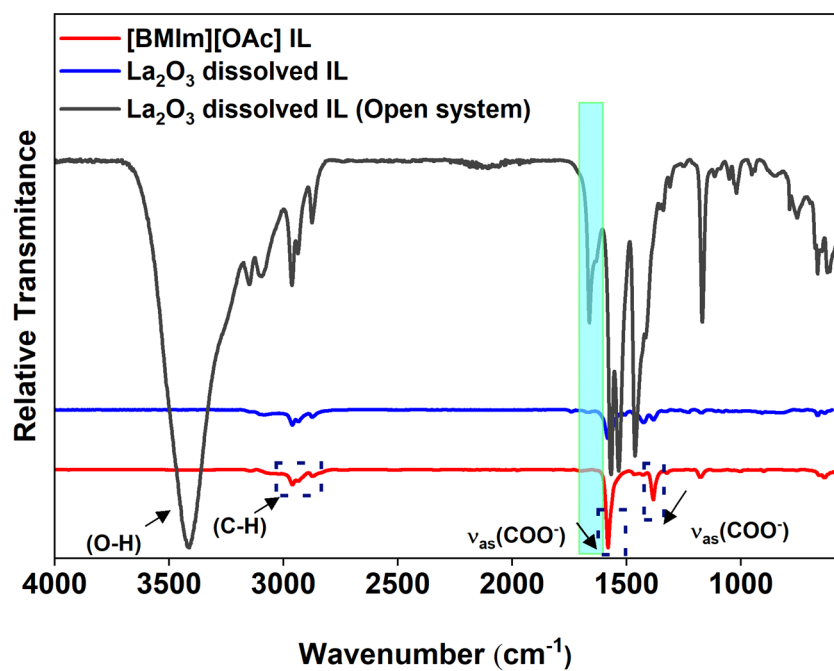

**Figure S12.** FTIR spectra of neat [BMIm][OAc], a fresh solution of  $\text{La}_2\text{O}_3$  in the IL, and a solution with decomposed IL.

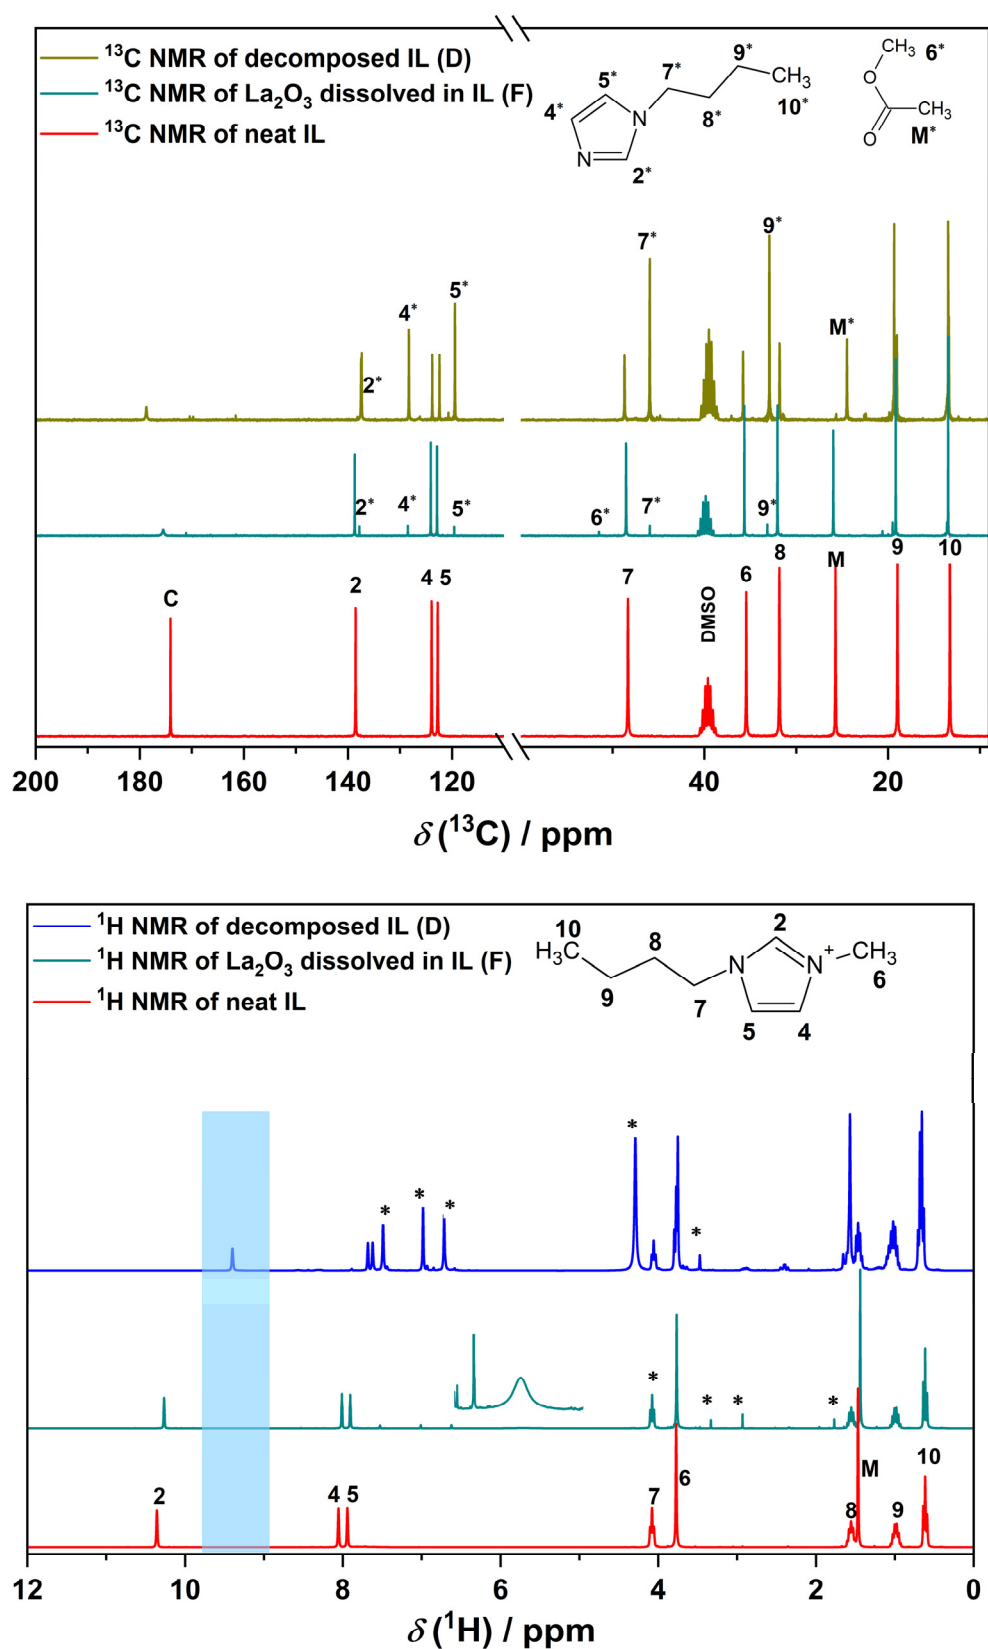

**Figure S13.**  $^{13}\text{C}$  (top) and  $^1\text{H}$  NMR (bottom) spectra of neat [BMIm][OAc], of a freshly prepared solution of  $\text{La}_2\text{O}_3$  in the IL, and of a solution with largely decomposed IL.

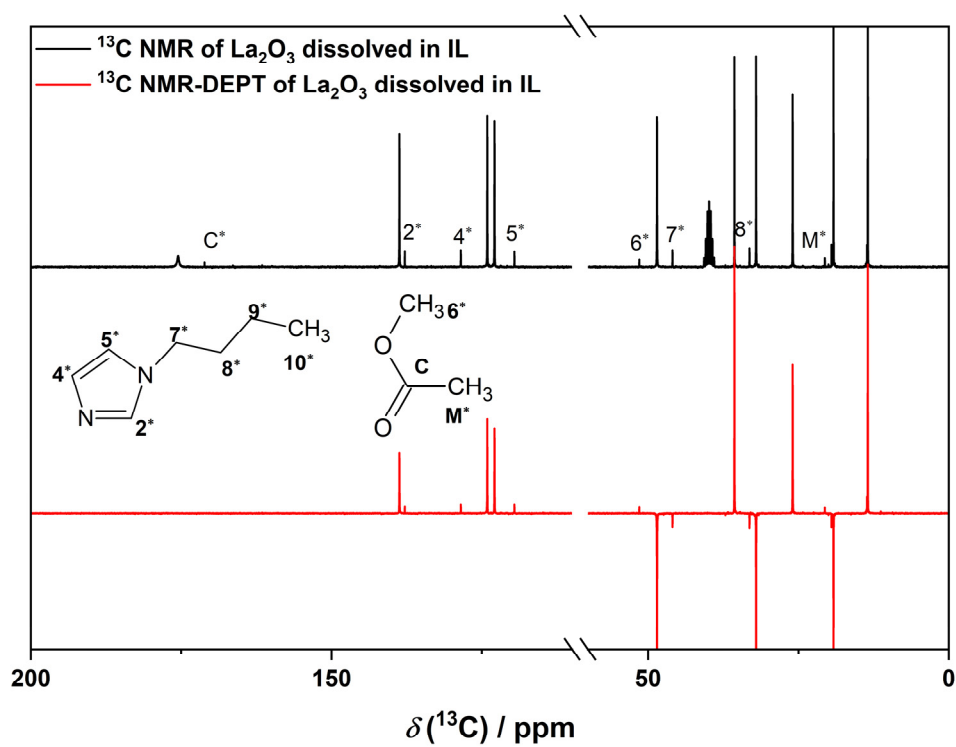

**Figure S14.**  $^{13}\text{C}$  NMR spectrum and DEPT 135  $^{13}\text{C}$  NMR spectrum of a freshly prepared  $\text{La}_2\text{O}_3$  solution in [BMIm][OAc].

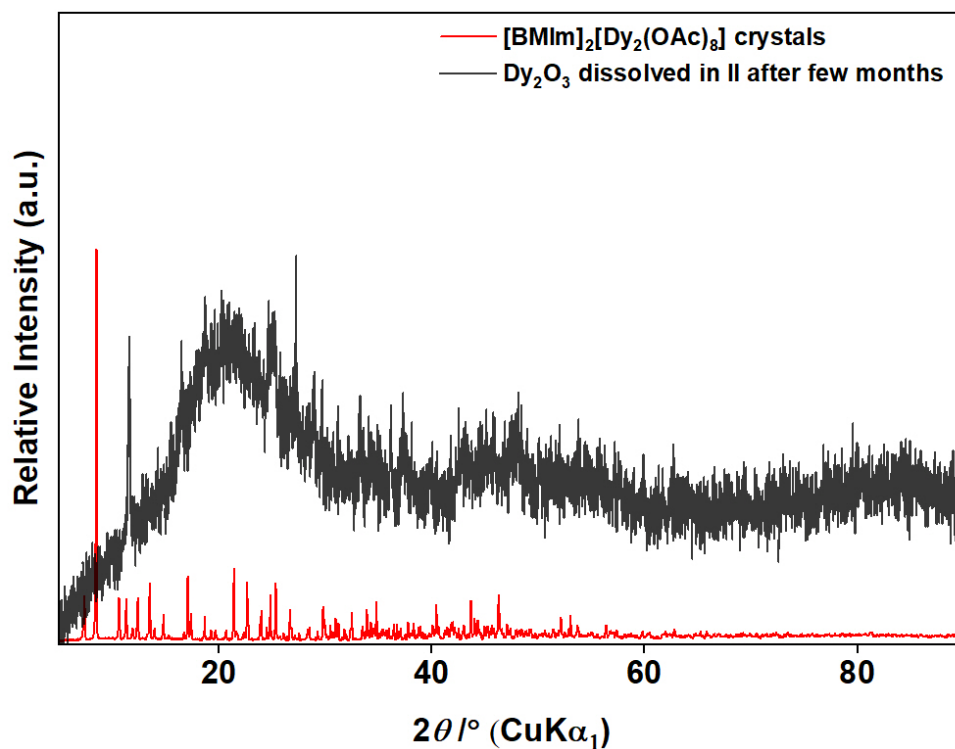

**Figure S15.** Degradation of  $[\text{BMIm}]_2[\text{Dy}_2(\text{OAc})_8]$  crystals in the reaction mixture after one month in air.

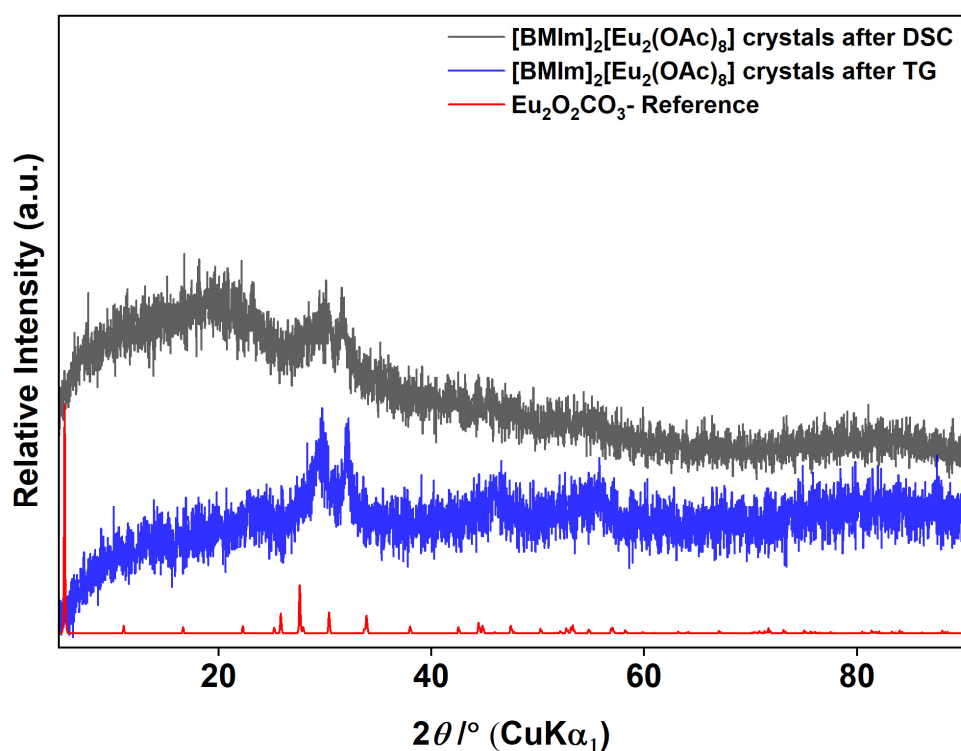

**Figure S16.** PXRD diffractogram of  $[\text{BMIm}]_2[\text{Eu}_2(\text{OAc})_8]$  samples after DSC or after TG under argon with a maximum temperature of  $500^\circ\text{C}$ .

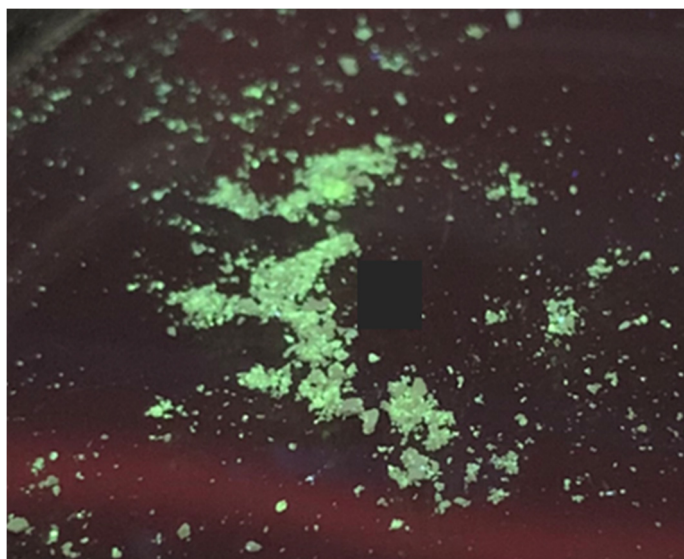

**Figure S17.** Luminescence of  $[\text{BMIm}]_2[\text{Tb}_2(\text{OAc})_8]$  under UV light of 312 nm.



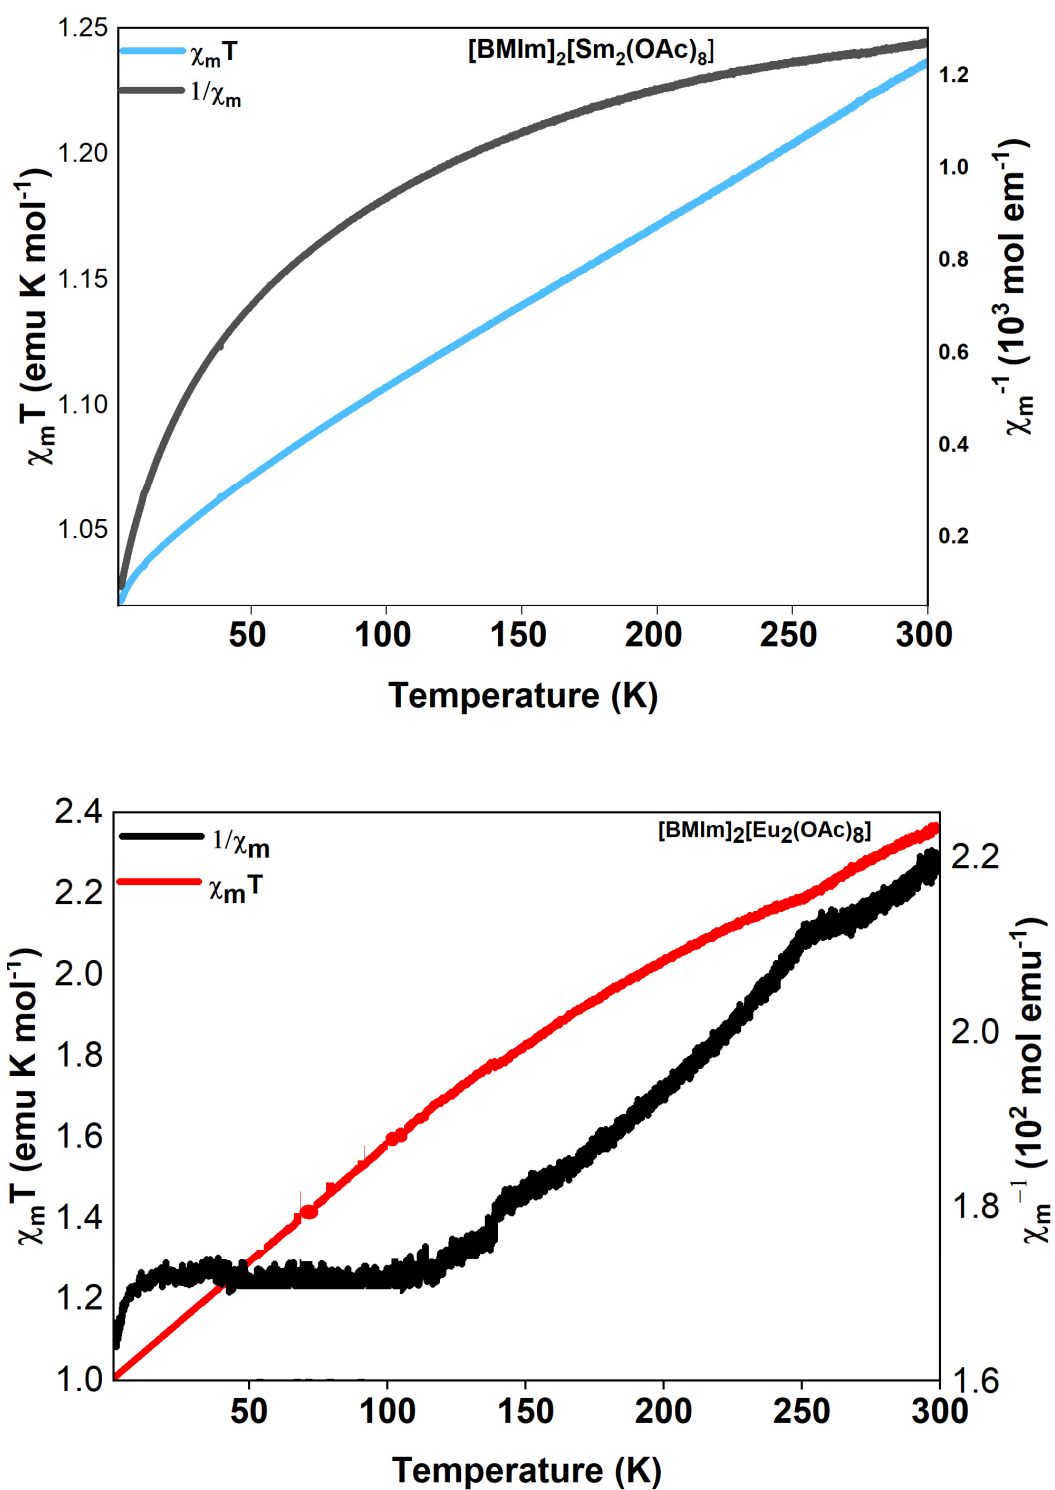

**Figure S18.**  $\chi_m T$  and  $\chi_m^{-1}$  plots for [BMIm]<sub>2</sub>[Sm<sub>2</sub>(OAc)<sub>8</sub>] and [BMIm]<sub>2</sub>[Eu<sub>2</sub>(OAc)<sub>8</sub>].

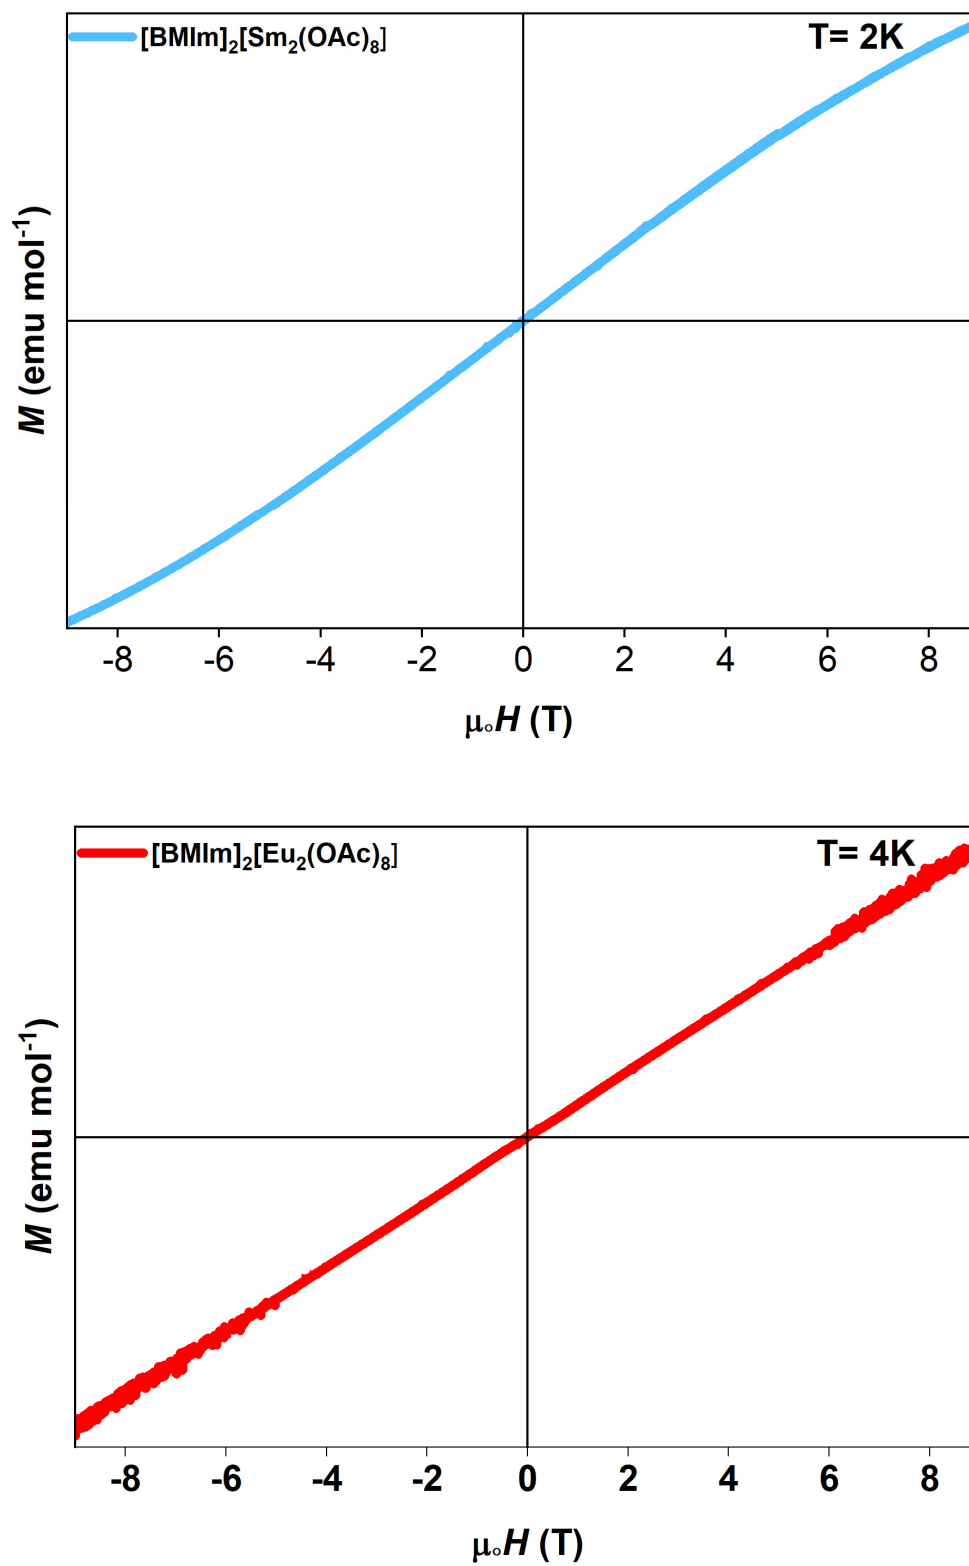

**Figure S19.** Magnetization ( $M$ ) versus field ( $H$ ) for  $[\text{BMIm}]_2[\text{Sm}_2(\text{OAc})_8]$  and  $[\text{BMIm}]_2[\text{Eu}_2(\text{OAc})_8]$ .
